# Supplementary material for: Why People With High Alexithymia Make More Utilitarian Judgments
Source: Atypon-hosted journal article supplement (doi:10.1027/1618-3169/a000474), 2020-01-01
Supplement: 1618-3169_a000474_esm1.pdf [file 1618-3169_a000474_esm1.pdf]

## Electronic Supplemental Material

### **“Why people with high alexithymia make more utilitarian judgements: The role of empathic concern and deontological inclinations”**

Xiangyi Zhang <sup>a, b, 1</sup>, Zihui Wu <sup>a, 1</sup>, Shenglan Li <sup>a</sup>, Ji Lai <sup>a</sup>, Meng Han <sup>a</sup>, Xiyou Chen <sup>c</sup>, Chang Liu <sup>d</sup>, Daoqun Ding <sup>a, b, \*</sup>

<sup>a</sup> Department of Psychology, School of Education Science, Hunan Normal University, Changsha, China

<sup>b</sup> Cognition and Human Behavior Key Laboratory of Hunan Province, Hunan Normal University, Changsha, China

<sup>c</sup> Changsha Experimental High School, Changsha, China

<sup>d</sup> Department of Criminal Justice, Ningxia Police Vocational College, Ningxia, China

<sup>1</sup> Xiangyi Zhang and Zihui Wu contributed equally to this study.

\* Correspondence should be addressed to Daoqun Ding, Department of Psychology, School of Education Science, Hunan Normal University, 36 Lushan Road, Changsha 410081, Hunan, China. E-mail: [psychding@hunnu.edu.cn](mailto:psychding@hunnu.edu.cn).

**Table E1. The TAS-20 scores of the high and low alexithymia groups.**

| Group                         | DDF              | DIF              | EOT              | TAS-20           |
|-------------------------------|------------------|------------------|------------------|------------------|
| High alexithymia ( $n = 45$ ) | $17.40 \pm 1.80$ | $24.49 \pm 2.46$ | $22.27 \pm 2.80$ | $64.16 \pm 3.41$ |
| Low alexithymia ( $n = 47$ )  | $10.30 \pm 1.83$ | $13.17 \pm 3.0$  | $17.23 \pm 2.81$ | $40.70 \pm 3.44$ |

*Note.* DDF = difficulty describing feelings; DIF = difficulty identifying feelings; EOT = externally oriented thinking; TAS-20 = Toronto Alexithymia Scale-20.

**Text E1. Results of the mediation analysis of empathic concern and deontological inclinations ( $D$  parameter) including the utilitarian inclinations ( $U$  parameter) as a covariate.**

We have conducted a mediation analysis on empathic concern and deontological inclinations ( $D$  parameter) including the utilitarian inclinations ( $U$  parameter) as a covariate. The results revealed that the indirect effect of alexithymia on relative judgements via deontological inclinations was significant,  $\beta = .191$ ,  $SE = .084$ , 95% CI = [.032, .364]. Alexithymia had a significant negative effect on deontological inclinations ( $\beta = -.26$ ,  $p = .014$ ), which in turn had a highly significant negative effect on relative judgements ( $\beta = -.69$ ,  $p < .001$ ).

The indirect effect of alexithymia on relative judgements via empathic concern and deontological inclinations was also significant,  $\beta = .077$ ,  $SE = .036$ , 95% CI = [.018, .161]. Specifically, alexithymia had a highly significant negative effect on empathic concern ( $\beta = -.42$ ,  $p < .001$ ), and empathic concern had a significant positive effect on deontological inclinations ( $\beta = .25$ ,  $p = .017$ ), which in turn had a highly significant negative effect on relative judgements ( $\beta = -.69$ ,  $p < .001$ ).
